# Supplementary material
Source: Elsevier journal article supplement (https://www.sciencedirect.com/science/article/pii/S188558572400272X)
Supplement: mmc1 [file mmc1.pdf]

SUPPLEMENTARY DATA

Table 1 of the supplementary data

General characteristics of centres included in the study in year 2019.

| Variable                                      |           | All center<br>N = 9 | General cardiology<br>centers<br>n = 3 | Tertiary referral centers<br>n = 6 | P     |
|-----------------------------------------------|-----------|---------------------|----------------------------------------|------------------------------------|-------|
| Patients included (total)                     |           | 797                 | 175                                    | 622                                |       |
| Patients included by centre                   | Mean ± SD | 90 ± 38             | 58 ± 38                                | 105 ± 30                           | .080  |
|                                               | Range     | 20, 143             | 20, 95                                 | 61, 143                            |       |
| Reference population by centre                | Mean ± SD | 408184 ± 126613     | 375000 ± 169337                        | 424777 ± 114841                    | .612  |
|                                               | Range     | 180000, 560000      | 180000, 485000                         | 270000, 560000                     |       |
| Staff cardiologists                           | Mean ± SD | 22 ± 9              | 13 ± 6                                 | 26 ± 7                             | .037  |
|                                               | Range     | 7, 38               | 7, 19                                  | 19, 38                             |       |
| Total number of hospitalization beds          | Mean ± SD | 786 ± 406           | 405 ± 141                              | 976 ± 353                          | .034  |
|                                               | Range     | 266, 1456           | 266, 548                               | 531, 1456                          |       |
| Cardiology unit hospitalization beds          | Mean ± SD | 39 ± 19             | 24 ± 12                                | 47 ± 17                            | .077  |
|                                               | Range     | 10, 69              | 10, 31                                 | 28, 69                             |       |
| Cardiology hospital discharges                | Mean ± SD | 2706 ± 1220         | 1509 ± 644                             | 3305 ± 961                         | .024  |
|                                               | Range     | 830, 4641           | 830, 2111                              | 2096, 4641                         |       |
| Cardiology outpatient clinic visits           | Mean ± SD | 19518 ± 8064        | 12199 ± 3675                           | 23177 ± 7101                       | .044  |
|                                               | Range     | 9125, 30587         | 9125, 16269                            | 10023, 30587                       |       |
| Non-invasive cardiology tests                 | Mean ± SD | 15351 ± 6065        | 12072 ± 6279                           | 16991 ± 5780                       | .279  |
|                                               | Range     | 5386, 24261         | 5386, 17844                            | 10626, 24261                       |       |
| Diagnostic catheterization procedures         | Mean ± SD | 2032 ± 864          | 1134 ± 927                             | 2482 ± 352                         | .120  |
|                                               | Range     | 513, 3012           | 513, 2200                              | 2012, 3012                         |       |
| Percutaneous coronary interventions           | Mean ± SD | 1166 ± 555          | 727 ± 330                              | 1386 ± 525                         | .092  |
|                                               | Range     | 498, 2387           | 498, 1105                              | 872, 2387                          |       |
| Percutaneous cardiac structural interventions | Mean ± SD | 119 ± 89            | 1 ± 2                                  | 178 ± 10                           | <.000 |
|                                               | Range     | 0, 192              | 0, 4                                   | 167, 192                           |       |

|                                                   |               |               |              |               |      |
|---------------------------------------------------|---------------|---------------|--------------|---------------|------|
| Cardiac electronic device implantation procedures | Mean $\pm$ SD | 441 $\pm$ 287 | 92 $\pm$ 106 | 616 $\pm$ 132 | .001 |
|                                                   | Range         | 0, 836        | 0, 207       | 484, 836      |      |
| Atrial fibrillation ablation procedures           | Mean $\pm$ SD | 79 $\pm$ 74   | 0            | 119 $\pm$ 56  | .010 |
|                                                   | Range         | 0, 201        | 0            | 42, 201       |      |

SD, standard deviation.

**Figure 1 of the supplementary data.** Flow chart for determination of the 04MQI3 denominator.

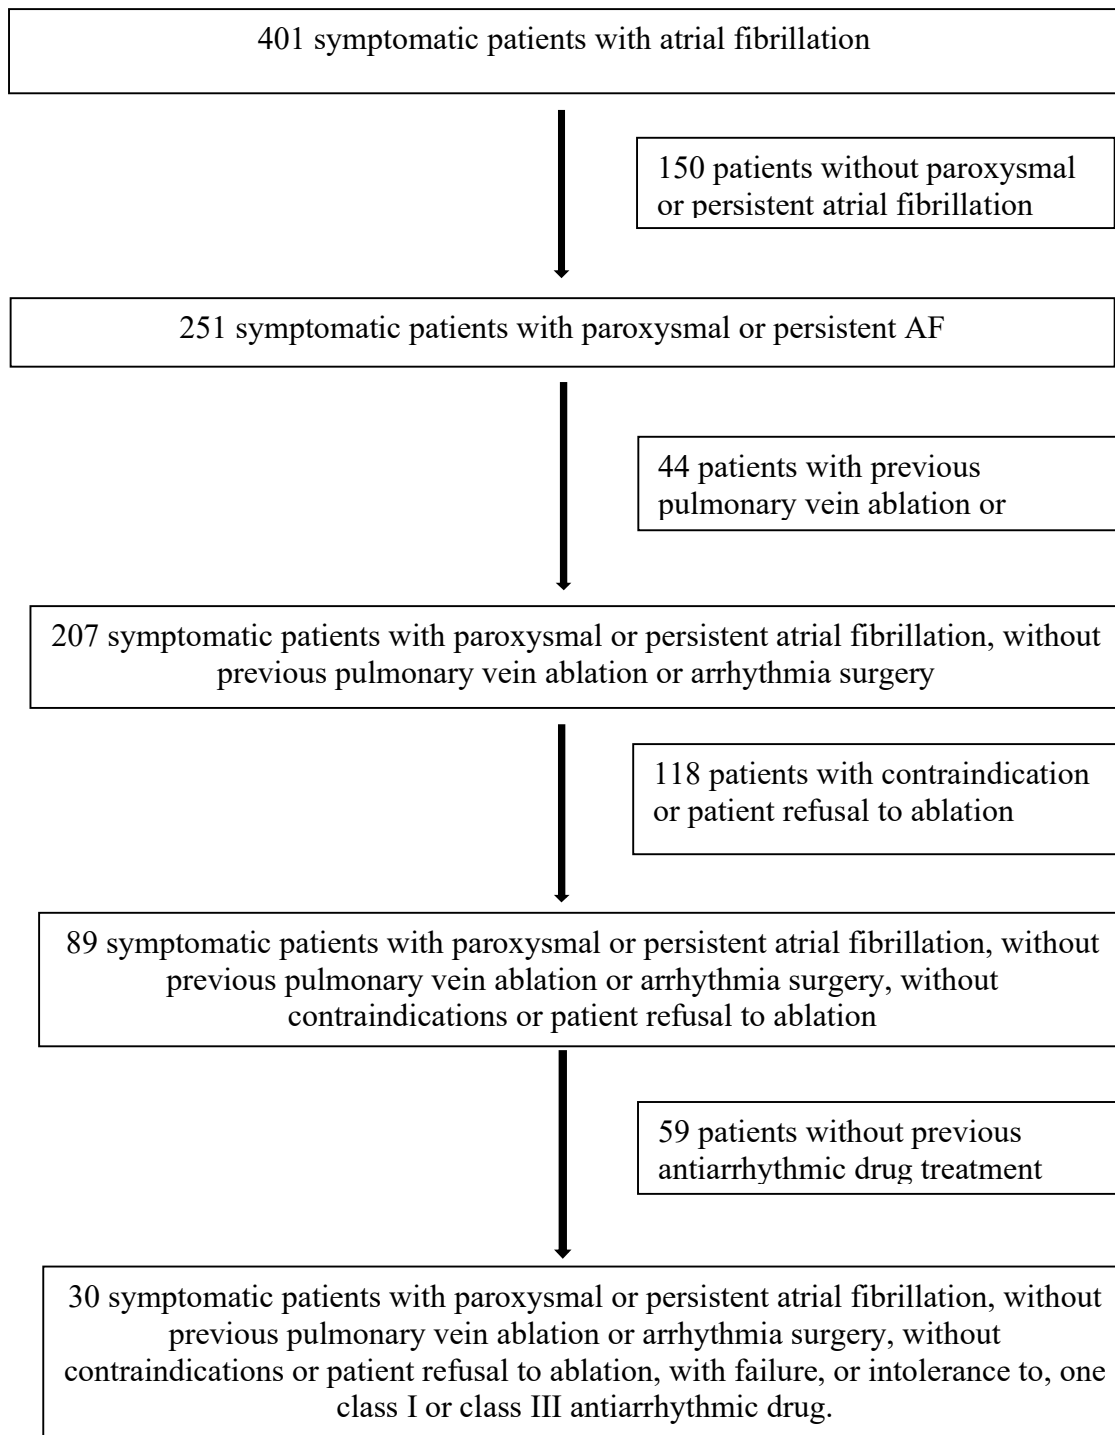

Cambiar "one class I" a "1 class I"

**° Investigators of the SEC-EXCELENCE in AF registry**

Cristina Aguilar Ferrer. Hospital Universitario de Jerez de la Frontera, Cádiz.  
Raquel Ajo Ferrer. Hospital General Universitario de Alicante.  
Maria Ajo Ferrer. Hospital General Universitario de Alicante.  
Edgar Alania. Hospital Marina Salud, Denia, Alicante.  
Thomas André Brouzet. Hospital General Universitario de Alicante.  
Elena Arbeló Laínez. Investigador Principal. Hospital Universitario Clínic, Barcelona.  
Hebert David Ayala More. Hospital Universitario La Fe, Valencia.  
Oscar Cano. Hospital Universitario La Fe, Valencia.  
Alba Cano. Hospital Universitario Clínic, Barcelona.  
Angela Carrillo Molina. Hospital General Universitario de Alicante.  
Pablo Casanova. Hospital Universitario Clínic, Barcelona.  
Ana del Rio Lechuga. Investigador Principal. Hospital Universitario de Jerez de la Frontera, Cádiz.  
Emilio Galcera. Hospital Marina Salud, Denia, Alicante.  
Amaya García Fernández. Hospital General Universitario de Alicante.  
Soraya González. Hospital Universitario La Paz, Madrid.  
Nelsa González Aguado. Hospital Universitario Virgen de la Victoria, Málaga.  
Alicia Ibáñez Criado. Investigador Principal. Hospital General Universitario de Alicante.  
José Luis Ibáñez Criado. Hospital General Universitario de Alicante.  
Maria Teresa Izquierdo de Francisco. Hospital Universitario La Fe, Valencia.  
Frida Katerina Valenzuela. Hospital Universitario Clínic, Barcelona.  
Bernabé López. Hospital Universitario La Fe, Valencia.  
Carlos Martín Alfaro. Hospital Costa del Sol, Marbella, Málaga.  
Leticia Mateos De la Haba. Hospital Universitario de Jerez de la Frontera, Cádiz.  
Herminio Morillas. Hospital Marina Salud, Denia, Alicante.  
Josep Navarro. Hospital Universitario La Fe, Valencia.  
Joaquín Osca. Investigador Principal. Hospital Universitario La Fe, Valencia.  
Marcel Palacio. Hospital Marina Salud, Denia, Alicante.  
Rafael Peinado Peinado. Investigador Principal. Hospital Universitario La Paz, Madrid.  
Alejandro Isidoro Pérez Cabeza. Investigador Principal. Hospital Universitario Virgen de la Victoria, Málaga.  
Alberto Piserra López-Fernández de Heredia. Hospital Universitario Reina Sofía, Córdoba.  
Enrique Robles. Hospital Universitario La Fe, Valencia.  
Francisco Ruiz Mateas. Hospital Costa del Sol, Marbella, Málaga.  
Martín Ruiz Ortiz. Investigador Principal. Hospital Universitario Reina Sofía, Córdoba. Principal Investigator of the study.  
Jorge Sanz. Hospital Universitario La Fe, Valencia.  
Valero Soriano. Hospital Universitario La Fe, Valencia.  
Almudena Valle Alberca. Investigador Principal. Hospital Costa del Sol, Marbella, Málaga.  
Alfonso Valle Muñoz. Investigador Principal. Hospital Marina Salud, Denia, Alicante.  
Julián David Yara. Hospital Universitario Clínic, Barcelona.
